# Supplementary material for: Validation of a Dietary Questionnaire to Screen Omega-3 Fatty Acids Levels in Healthy Adults
Source: MDPI journal article supplement (doi:10.3390/nu11071470), 2019-06-28
Supplement: s1 [file s1]

Supplemental Figure 1. Dietary questionnaire

**Preliminary Dietary Assessment**

(Focusing on consumption of DHA and EPA)

- a. Do you currently follow a special diet?
- b. How long have you been following the diet you mentioned above?
- c. Do you currently take any dietary supplements? Please list them all and the frequency.

|                                                 |
|-------------------------------------------------|
| Section 1. Consumption of fish oil supplements. |
|-------------------------------------------------|

Question 1. Fish oil supplements (pills)

- a. Which kind (including brand)? \_\_\_\_\_
- b. Dose of each pill? \_\_\_\_\_
- c. How often do you take the pills (how many times per week)? \_\_\_\_\_
- d. How many pills each time? \_\_\_\_\_
- e. How long have you been taking fish oil supplements? \_\_\_\_\_

Question 2. How often do you take fish oil (liquid)?

- a. Which kind (including brand)? \_\_\_\_\_
- b. Dose per serving (from the label)? \_\_\_\_\_
- c. How often do you take oil (how many times per week)? \_\_\_\_\_
- d. How much do you take fish oil each time? \_\_\_\_\_
- e. How long have you been taking the supplements? \_\_\_\_\_

Comments:

|                                               |
|-----------------------------------------------|
| Section 2. Consumption of fish and shellfish. |
|-----------------------------------------------|

Question 1. Have you been taking any of the following items on a WEEKLY basis in the past 6 month? Please include all ocean fish/shellfish that you eat regularly (at least on a weekly basis) in the past 6 month in this section. Use your best estimation for serving size.

Example: Tuna, canned, 3 times a week, 2 tablespoon.

| Food item       | Kind | Cooking method | Frequency | Serving size | How long |
|-----------------|------|----------------|-----------|--------------|----------|
| <u>Anchovy</u>  |      |                |           |              |          |
| <u>Bass</u>     |      |                |           |              |          |
| <u>Bluefish</u> |      |                |           |              |          |
| <u>Cisco</u>    |      |                |           |              |          |
| <u>Cod</u>      |      |                |           |              |          |
| <u>Drum</u>     |      |                |           |              |          |
| <u>Halibut</u>  |      |                |           |              |          |
| <u>Herring</u>  |      |                |           |              |          |
| <u>Mackerel</u> |      |                |           |              |          |

| Food item        | Kind | Cooking method | Frequency | Serving size | How long |
|------------------|------|----------------|-----------|--------------|----------|
| <u>Pollock</u>   |      |                |           |              |          |
| <u>Sablefish</u> |      |                |           |              |          |
| <u>Salmon</u>    |      |                |           |              |          |
| <u>Sardine</u>   |      |                |           |              |          |
| <u>Shark</u>     |      |                |           |              |          |
| <u>Shad</u>      |      |                |           |              |          |
| <u>Smelt</u>     |      |                |           |              |          |
| <u>Swordfish</u> |      |                |           |              |          |
| <u>Tuna</u>      |      |                |           |              |          |
| <u>Trout</u>     |      |                |           |              |          |
| <u>Whitefish</u> |      |                |           |              |          |
| <u>Wolfish</u>   |      |                |           |              |          |
| <u>Caviar</u>    |      |                |           |              |          |

| Food item | Kind | Cooking method | Frequency | Serving size | How long |
|-----------|------|----------------|-----------|--------------|----------|
| Roe       |      |                |           |              |          |
| Crab      |      |                |           |              |          |
| Lobster   |      |                |           |              |          |
| Mussel    |      |                |           |              |          |
| Oyster    |      |                |           |              |          |
| Shrimp    |      |                |           |              |          |
| Squid     |      |                |           |              |          |
|           |      |                |           |              |          |
|           |      |                |           |              |          |
|           |      |                |           |              |          |
|           |      |                |           |              |          |

Section 3: Consumption of omega-3 fortified foods.

Question 1: Have you been taking any omega-3 fortified foods on a WEEKLY basis in the past 6 months? Please include them all in this section.

| Food item | type of ω-3 FA | Frequency | Serving size | How long |
|-----------|----------------|-----------|--------------|----------|
|           |                |           |              |          |
|           |                |           |              |          |
|           |                |           |              |          |
|           |                |           |              |          |
|           |                |           |              |          |
|           |                |           |              |          |

Comments:
